# Supplementary material for: Distinct roles of striatal direct and indirect pathways in value-based decision making
Source: eLife journal article supplement (doi:10.7554/elife.46050), 2019-07-16
Supplement: supp [file elife-46050-supp-v1.zip]

Archive with 6 entries (6 files):
- elife_poa_e46050_Figure_1_figure_supplement_1.tif
- elife_poa_e46050_Figure_4_figure_supplement_1.tif
- elife_poa_e46050_Transparent_Reporting_File.pdf
- elife_poa_e46050_Figure_3_figure_supplement_1.tif
- elife_poa_e46050_Figure_2_figure_supplement_1.tif
- elife_poa_e46050_Supplementary_file_1.docx
