# Supplementary material for: Distinct roles of striatal direct and indirect pathways in value-based decision making
Source: eLife journal article supplement (doi:10.7554/elife.46050), 2019-07-16
Supplement: supp [file elife-46050-supp-v1.zip › elife_poa_e46050_Supplementary_file_1.docx]

**
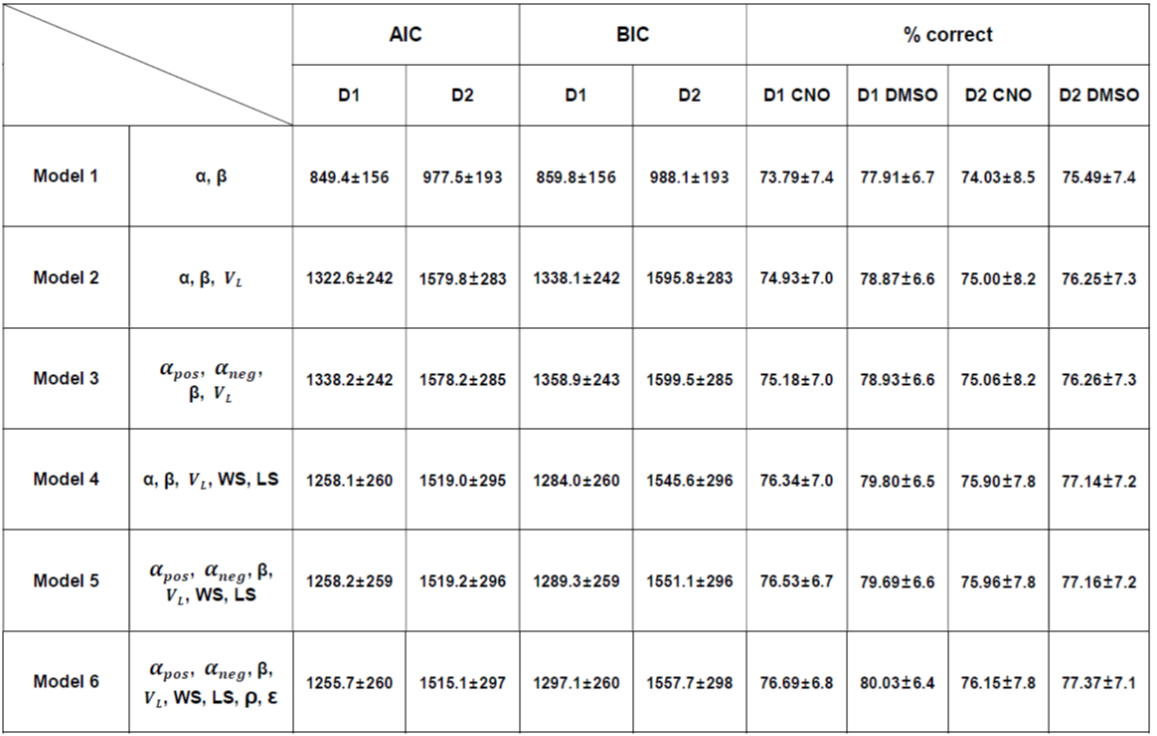
**

**Model comparison.** Akaike’s information criteria (AIC), Bayesian information criteria (BIC), and the accuracy to predict the animal’s actual choice (leave-one-out cross-validation; % correct) in the TAB task are shown for different models. Mean±SEM across animals.
