# Supplementary figures and images for: Distinct roles of striatal direct and indirect pathways in value-based decision making
Source: eLife journal article supplement (doi:10.7554/elife.46050), 2019-07-16

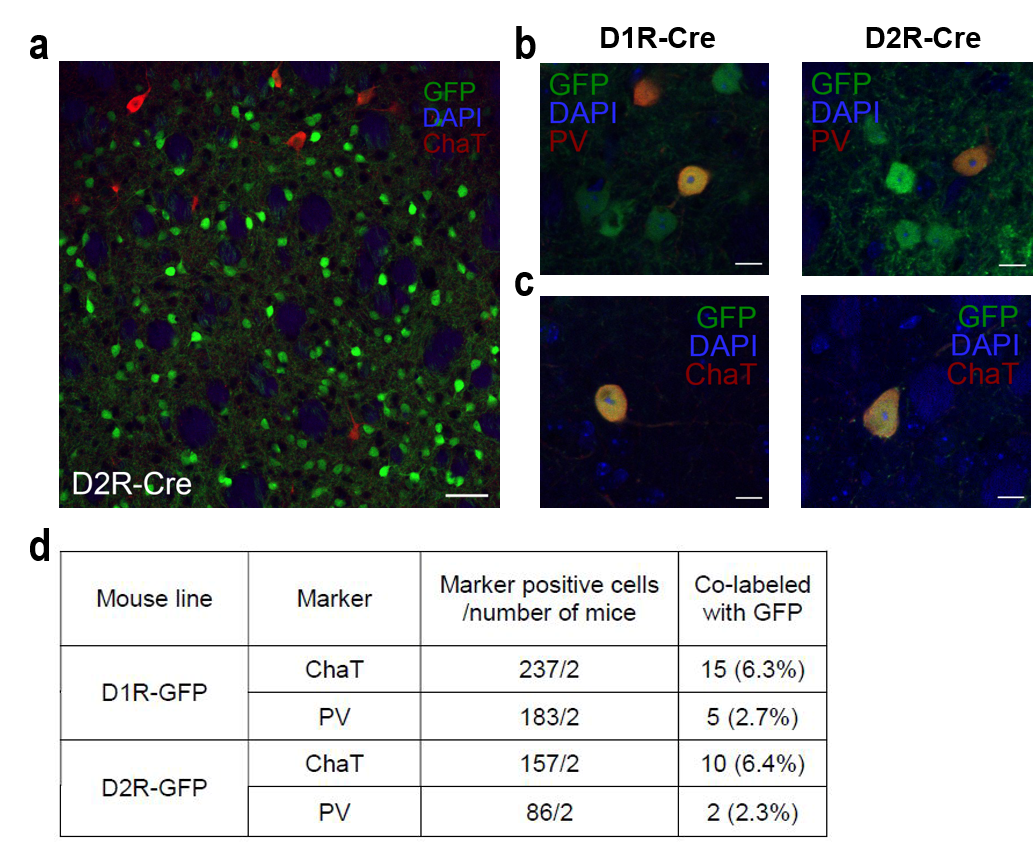

Supplement: supp [file elife-46050-supp-v1.zip › elife_poa_e46050_Figure_1_figure_supplement_1.tif]

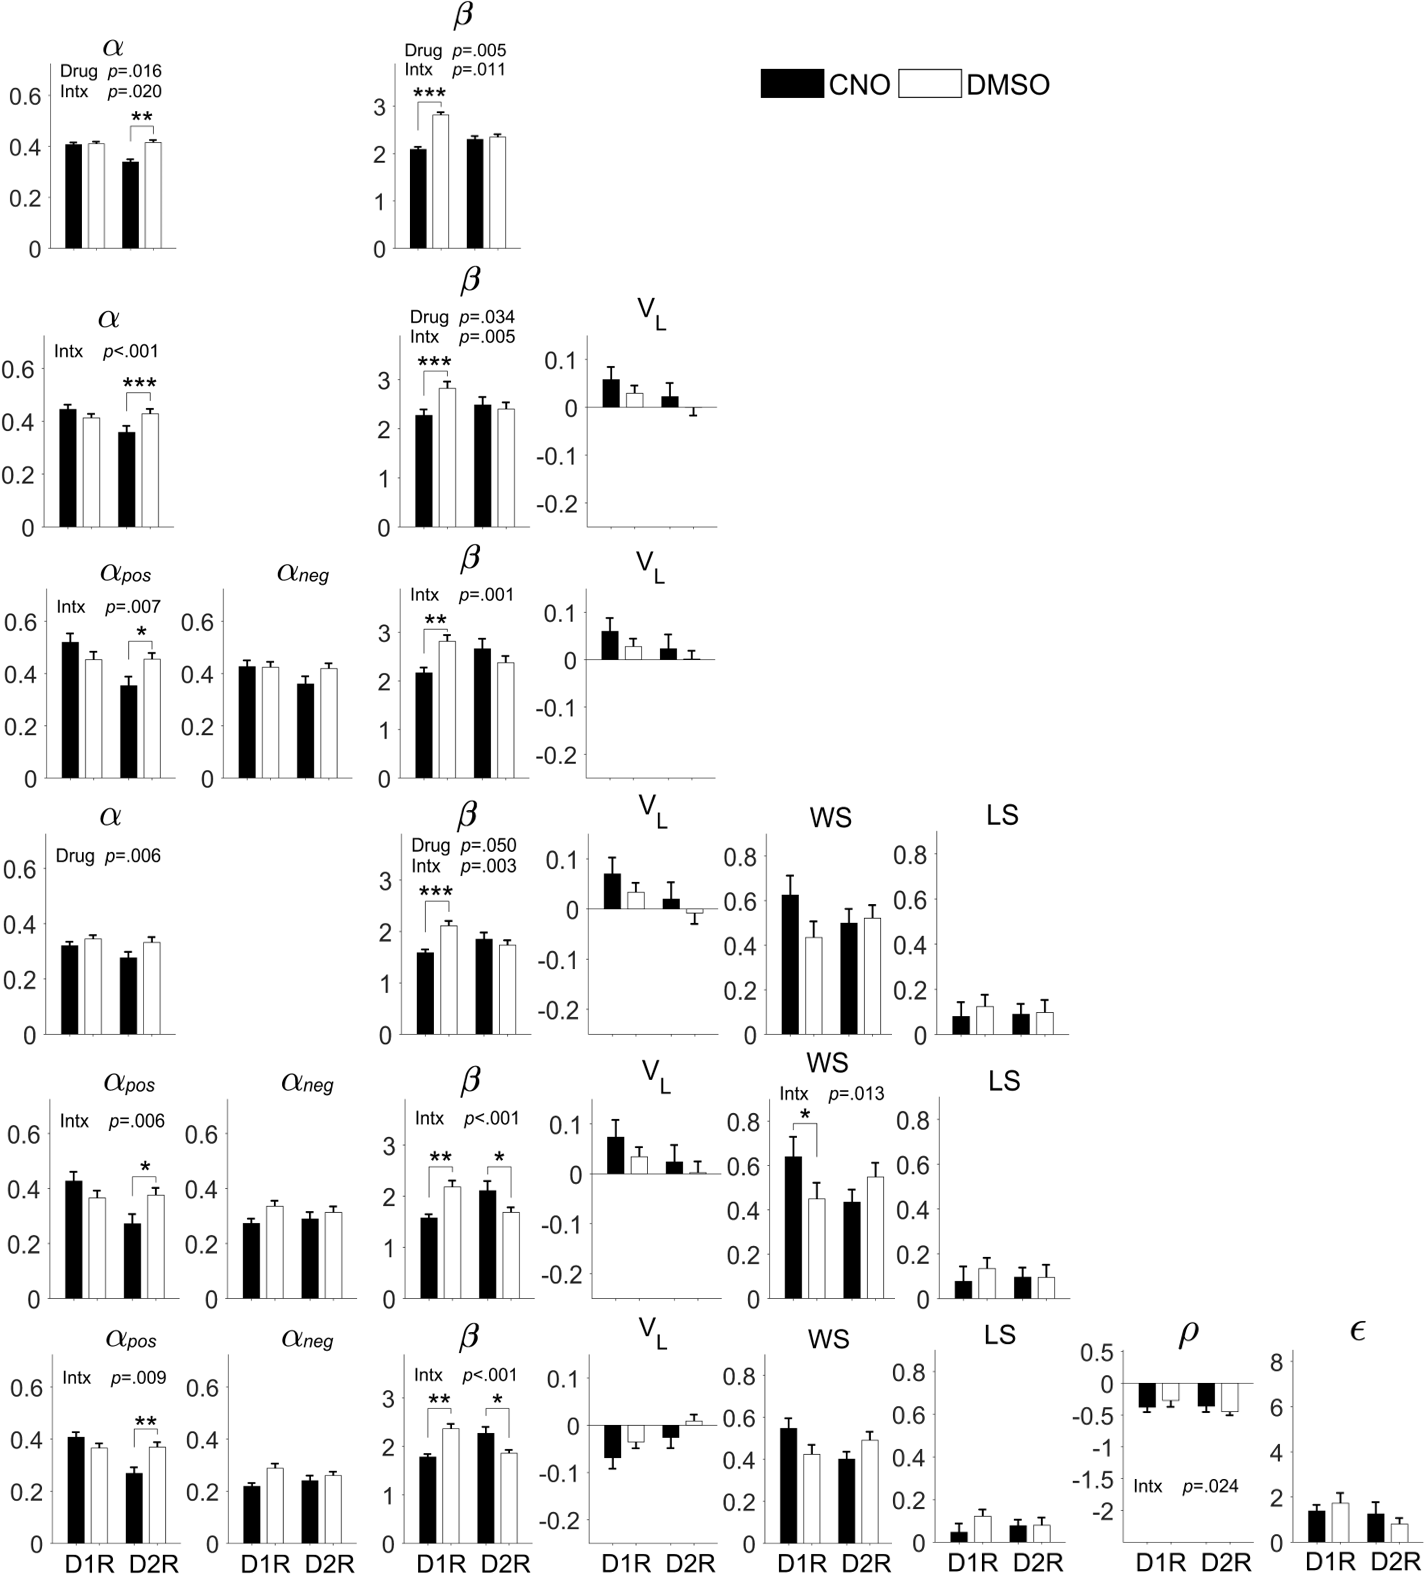

Supplement: supp [file elife-46050-supp-v1.zip › elife_poa_e46050_Figure_4_figure_supplement_1.tif]

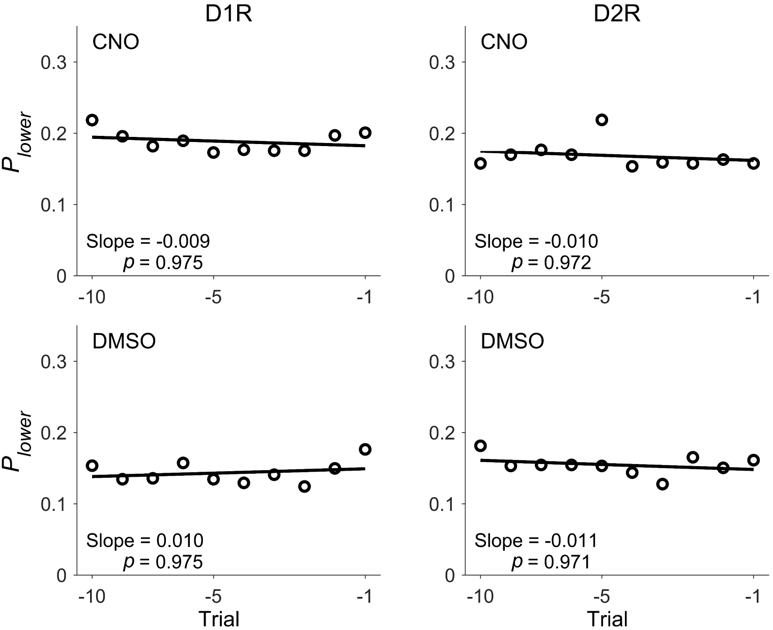

Supplement: supp [file elife-46050-supp-v1.zip › elife_poa_e46050_Figure_3_figure_supplement_1.tif]

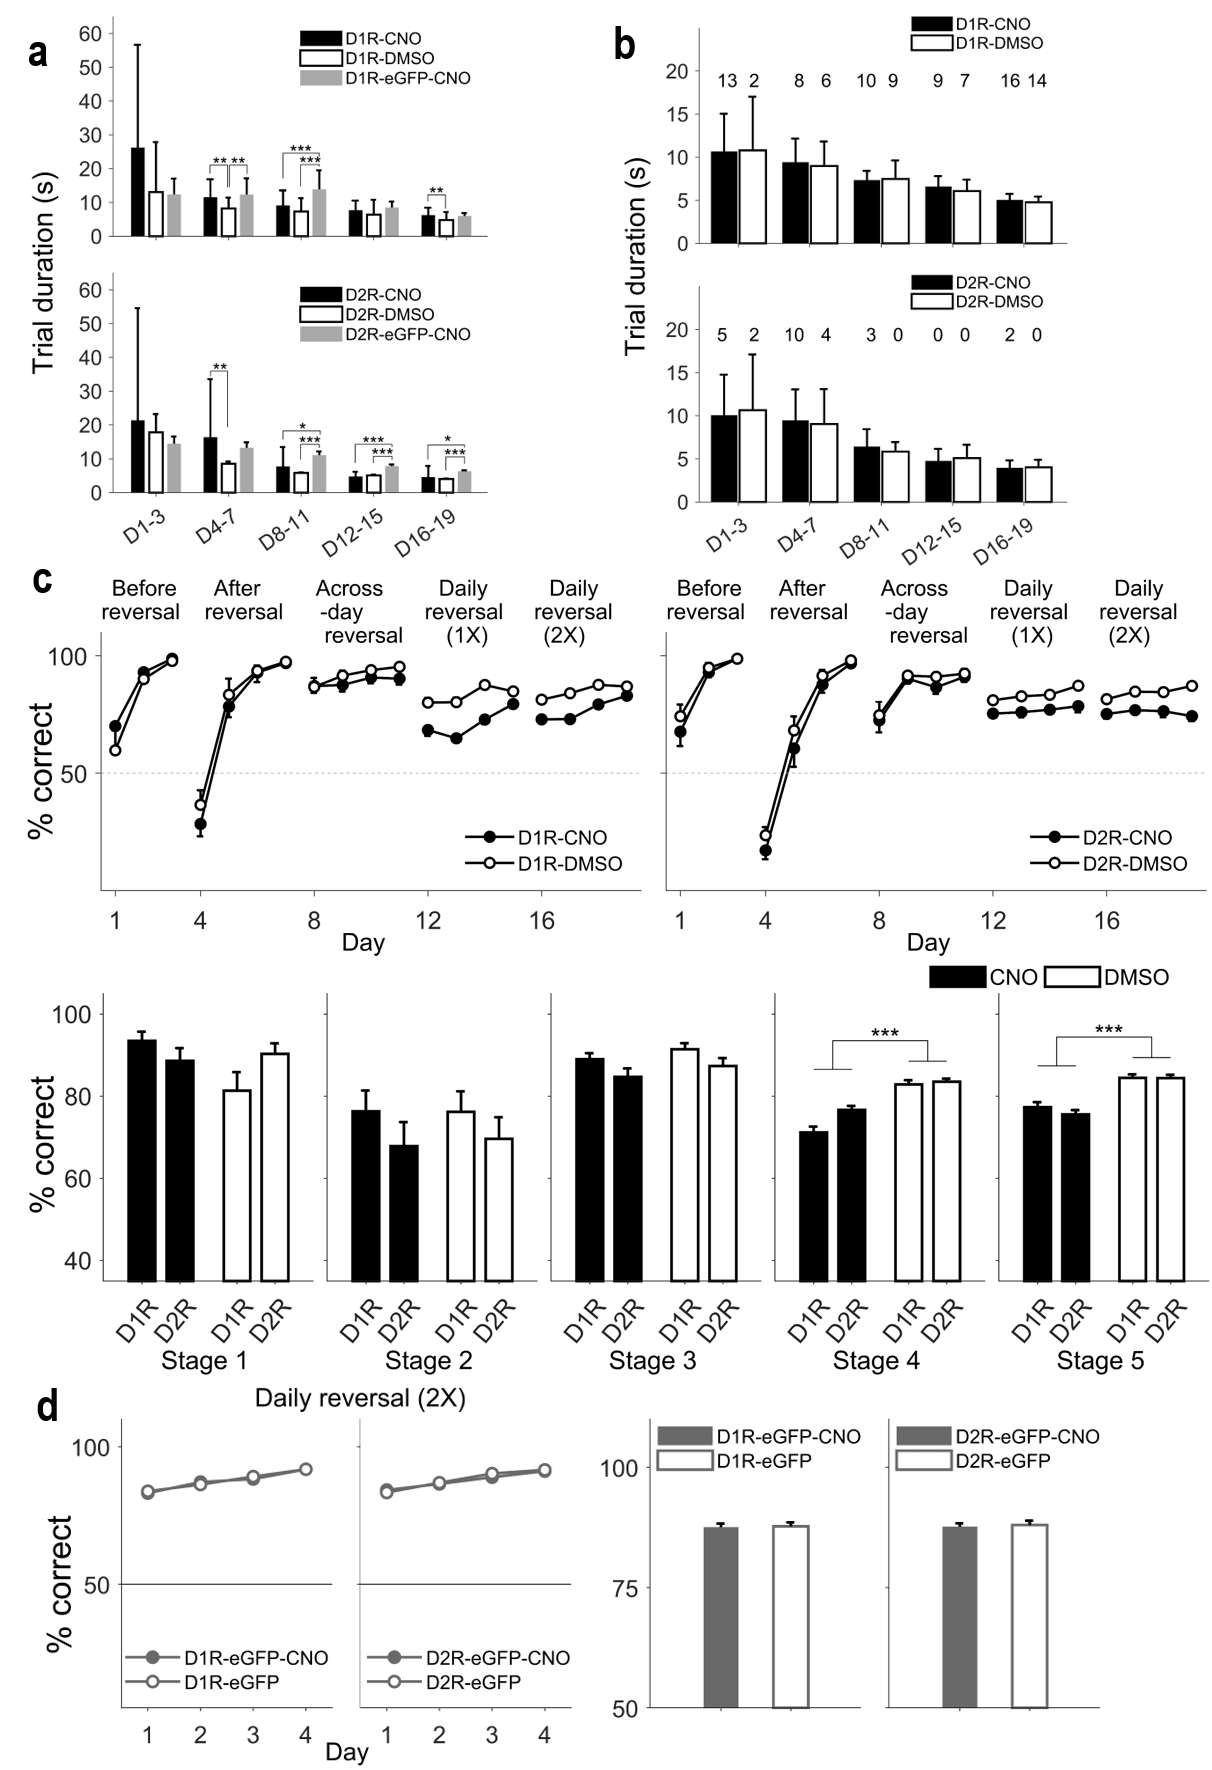

Supplement: supp [file elife-46050-supp-v1.zip › elife_poa_e46050_Figure_2_figure_supplement_1.tif]
